## Addendum: Systemic AL amyloidosis: current approach and future direction

**Maroun Bou Zerdan<sup>1</sup>, Lewis Nasr<sup>2</sup>, Farhan Khalid<sup>3</sup>, Sabine Allam<sup>4</sup>, Youssef Bouferraa<sup>5</sup>, Saba Batool<sup>6</sup>, Muhammad Tayyeb<sup>7</sup>, Shubham Adroja<sup>8</sup>, Mahinbanu Mammadii<sup>1</sup>, Faiz Anwer<sup>9</sup>, Shahzad Raza<sup>9</sup> and Chakra P. Chaulagain<sup>10</sup>**

<sup>1</sup>Department of Internal Medicine, SUNY Upstate Medical University, Syracuse, NY 13210, USA

<sup>2</sup>University of Texas MD Anderson Cancer Center, Houston, TX 77030, USA

<sup>3</sup>Department of Internal Medicine, Monmouth Medical Center, Long Branch, NJ 07740, USA

<sup>4</sup>Department of Medicine and Medical Sciences, University of Balamand, Balamand, Lebanon

<sup>5</sup>Department of Internal Medicine, Cleveland Clinic, Cleveland, OH 44195, USA

<sup>6</sup>Department of Internal Medicine, UnityPoint Methodist, Peoria, IL 61636, USA

<sup>7</sup>Department of Internal Medicine, Monmouth Medical Center, Long Branch, NJ 07740, USA

<sup>8</sup>Hematology and Medical Oncology, Houston Methodist Cancer Center, Houston, TX 77094, USA

<sup>9</sup>Department of Hematology-Oncology, Cleveland Clinic, Cleveland, OH 44195, USA

<sup>10</sup>Department of Hematology-Oncology, Myeloma and Amyloidosis Program, Maroone Cancer Center, Cleveland Clinic Florida, Weston, FL 33331, USA

**Published:** July 20, 2023

**Copyright:** © 2023 Bou Zerdan et al. This is an open access article distributed under the terms of the [Creative Commons Attribution License](#) (CC BY 3.0), which permits unrestricted use, distribution, and reproduction in any medium, provided the original author and source are credited.

**This article has an addendum:** Research funding was obtained from the Cleveland Clinic Florida, Maroone Cancer Center, Malignant Hematology Research Fund.

Original article: Oncotarget. 2023; 14:384–394. <https://doi.org/10.18632/oncotarget.28415>
